# Supplementary material for: Natural History of Cognitive Impairment in Critical Illness Survivors. A Systematic Review
Source: PubMed Central journal article supplement — Am J Respir Crit Care Med. 2020 Jul 15;202(2):193–201. doi: 10.1164/rccm.201904-0816CI (PMC7365360; doi:10.1164/rccm.201904-0816ci), 2020-07-15
Supplement: rccm.201904-0816CI_honarmand_data_supplement.pdf [file rccm.201904-0816CI_honarmand_data_supplement.pdf]

Natural History of Cognitive Impairment in Critical Illness Survivors: A Systematic Review

Kimia Honarmand MD, MSc, Rajkamal S. Lalli MD, Fran Priestap MSc, Jennifer L. Chen BSc,

Christopher W. McIntyre MD, PhD, Adrian M. Owen PhD, Marat Slessarev MD, MSc

**Online Data Supplement**

## Supplemental Digital Content 1 – Search Strategy

### Search History saved as "2017.07. Cognitive function\_ neuropsychological testing\_ICU\_M"

*Topic:* cognitive function/dysfunction/impairment in ICU/ critically ill/ admitted with sepsis/acute respiratory distress syndrome/ventilated patients measured by using cognitive testing, neuropsychological testing, neurobehavioral testing, etc.

For: Dr Kimia Honarmand

**Database:** Ovid MEDLINE(R) Epub Ahead of Print, In-Process & Other Non-Indexed Citations, Ovid MEDLINE(R) Daily and Ovid MEDLINE(R) <1946 to Present>

*Search Strategy:*

- 
- 1 (critical\$ adj2 ill\$.mp. or Critical Care/ or intensive care units/ or Critical Illness/ or exp Sepsis/ or Respiratory Distress Syndrome, Adult/ or APACHE.mp. or ((critical\$ or intensive or postintensive or post-intensive) adj care).mp. or (pyaemia\$ or pyemia\$ or pyohemia\$ or sepsis\$ or septicemia\$ or septicaemia\$.tw. or (((septic\$ or toxic\$ or endotoxic\$) adj2 shock\$) or (blood\$ adj2 poison\$)).tw. (367051)
  - 2 (intensive care unit\$ or ICU or (post-ICU or (post\$ adj3 ICU))).mp. (131853)
  - 3 **or/1-2 (373888)**
  - 4 exp Respiration, Artificial/ or exp Ventilators, Mechanical/ or (ventilat\$ adj2 (artificial\$ or mechanical\$)).tw. or (respirat\$ adj2 (artificial\$ or assisted\$ or mechanical\$)).tw. or (respirat\$ adj2 failure\$).tw. (119665)
  - 5 ((positive adj3 pressure adj5 (ventilat\$ or respir\$)) or (PPV and (pressure or ventilat\*))).tw. or (ventilat\$ adj3 patient\$.ti. or (ventilat\$ and patient\$.ab. /freq=3 (30607)
  - 6 Respiratory Distress Syndrome, Adult/ or (respirator\$ adj2 distress\$ adj2 syndrom\$.tw. or ARDS.tw. or ((acute\$ or adult\$) adj3 (respirator\$ adj3 distress\$)).mp. or (lung\$ adj2 shock\$.tw. (33528)
  - 7 (((post traumatic\$ or posttraumatic\$) adj3 (respirator\$ or lung\$)) and failure\$.tw. (65)
  - 8 ((post traumatic\$ or posttraumatic\$) adj3 pulmonar\$ adj3 insufficienc\$.tw. (69)
  - 9 exp Respiratory Insufficiency/ or (respirat\$ adj3 (failure\$ or insufficien\$ or paralysis\$ or deficienc\$ or disturbanc\$ or depression)).tw. or (acute\$ and ((respirat\$ adj2 insufficienc\$) or (respirat\$ adj2 failure\$))).tw. (88925)
  - 10 Acute Lung Injury/ or (acute\$ and (lung\$ adj2 injur\$)).tw. or ((lung\$ or pulmonary\$) adj3 (failure\$ or insufficien\$)).tw. (24068)
  - 11 **or/4-10 (214792)**

**12 3 or 11 (531847)**

13 exp Cognition Disorders/ or exp Cognition/ or exp Cognitive Therapy/ (227117)

14 neurobehavioral manifestations/ or exp communication disorders/ or exp memory disorders/ or intellectual disability/ or exp perceptual disorders/ or exp sensation disorders/ (327857)

15 (cognition\$ or cognitive\$ or (aphasia\$ or neuropsycholog\$ or neuro-psycholog\$ or neurocognit\$ or neuro-cognit\$ or neurobehav\$ or neuro-behav\$)).mp. (438458)

16 or/13-15 (773692)

**17 12 and 16 (7434)**

18 ((visuospatial\$ or (visuo\$ adj2 spatial\$) or (verbal\$ adj2 fluen\$) or (process\$ adj2 speed\$) or psychomotor\$ or psycho-motor\$ or memory\$ or personality\$ or perceptual\$ or attention\$ or concentration\$ or auditory\$ or visual\$ or sensory\$ or sensation\$ or spatial\$ or IQ or intelligence\$ or intellectual\$) adj5 (impairment\$ or impaired or deficit\$ or deficien\$ or abnormal\$ or dysfunction\$ or function\$ or skill\$ or problem\$ of complain\$)).mp. (237720)

**19 12 and 18 (2240)**

**20 17 or 19 (9087)**

21 language tests/ or exp neuropsychological tests/ or exp "Severity of Illness Index"/ or di.fs. (2535444)

22 (measure\$ or tool\$ or scale\$ or assess\$ or test\$ or score\$ or scoring\$ or checklist\$).mp. (8035573)

**23 or/21-22 (9469835)**

**24 20 and 23 (6136)**

25 exp Survivors/ or surviv\$.mp. or (post\$ adj2 discharg\$).mp. or (post-ICU or (post\$ adj3 ICU)).mp. or incidence.sh. or exp mortality/ or follow-up studies.sh. or prognos\$.tw. or predict\$.tw. or course\$.tw. or exp Prognosis/ or (followup or follow-up).tw. [Prognosis filter MEDLINE] (4684547)

**26 24 and 25 (3135)**

27 limit 26 to english language (2861)

28 (pediatr\$ or paediatr\$ or child\$ or adolescent\$ or infan\$ or newborn\$ or boy\$1 or neonat\$ or prenatal\$ or (mice or rat or rats or cat\$1 or cattle\$1 or dog\$1 or goat\$1 or horse\$1 or rabbit\$1 or sheep\$1 or swine\$1 or pig\$1 or canine\$1 or feline\$1 or porcine\$ or calf)).ti. (2892857)

29 27 not 28 (1903)

30 limit 29 to "all adult (19 plus years)" (1182)

31 limit 29 to "all child (0 to 18 years)" (427)  
32 29 not (31 not (30 and 31)) (1688)  
33 meta analysis.mp.pt. or MEDLINE.tw. or systematic review.tw. (231512)  
34 32 and 33 (53)  
35 limit 29 to "review articles" (305)  
36 32 not 35 (1419) [Review articles excluded but SRs retained]  
37 34 or 36 (1464)  
38 case report.ti. (201170)

**39 37 not 38 (1444)**

40 ("23328935" or ("20179286" or "21173281" or "17521481" or "18384589" or "21443796" or  
"21575208" or "15542793" or "12682497" or "17215737" or "11313077" or "22092200" or "20473145" or  
"20032274" or "19144052" or "16525845" or "16115244" or "14702249" or "22492988" or  
"21998261")).an. [validation set Medline] (24)

41 40 not 37 (0) [All records from a validation set are in the search results]

**42 17 and 39 (1203) [could reduce the number if line #18 not included - All records from a validation set would be in the search results]**

\*\*\*\*\*

Supplemental Digital Content 2. Characteristics of included studies.

| First Author, Year  | Country | Study Design             | Setting                           | Patient Population                                                                                                                     | Sample Size                                                                                                                                                                    | Cognitive Measure(s)                                                 | Definition of Cognitive Impairment                                                                   | Time Points Assessed                     | NOS Risk of Bias |
|---------------------|---------|--------------------------|-----------------------------------|----------------------------------------------------------------------------------------------------------------------------------------|--------------------------------------------------------------------------------------------------------------------------------------------------------------------------------|----------------------------------------------------------------------|------------------------------------------------------------------------------------------------------|------------------------------------------|------------------|
| Adhikari, 2009 (1)  | Canada  | Prospective cohort       | ICU                               | ARDS                                                                                                                                   | 61                                                                                                                                                                             | MAC-S                                                                | MAC-S score <1.5 SD below norms                                                                      | 6-48 mos post-ICU discharge (median 22)  | Fair             |
| Adhikari, 2011 (2)  | Canada  | Prospective cohort       | ICU                               | ARDS                                                                                                                                   | 47                                                                                                                                                                             | MAC-S                                                                | MAC-S score <1.5 SD below norms                                                                      | 61-64 mos post-ICU discharge (median 62) | Fair             |
| Ambrosino, 2002 (3) | Italy   | Prospective Case-control | Respiratory intermediate ICU      | COPD with respiratory failure                                                                                                          | 63 vs. 34 controls<br>6 mos f/u: 36 vs. 20 controls                                                                                                                            | MMSE                                                                 | MMSE score <24.                                                                                      | At ICU discharge + 3 mos + 6 mos         | Good             |
| Baumbach, 2016 (4)  | Germany | Prospective cohort       | Mixed ICU                         | Minimum LOS of 24 days                                                                                                                 | 3 mos: 127 patients + 52 families<br>6 mos: 103 patients + 36 families                                                                                                         | FACT-Cog Questionnaire                                               | PAM cluster analysis divided patients into impaired and non-impaired.                                | 3 mos post<br>6 mos post                 | Good             |
| Brummel, 2014 (5)   | USA     | RCT                      | MICU + SICU                       | Respiratory failure, or septic, cardiogenic, or haemorrhagic shock who lived close to centre; critically ill < 72 hours at recruitment | Randomized: 22 usual care, 22 physical treatment, 43 cognitive + physical treatment.<br>F/u at 3 mos: 12 usual care, 14 physical treatment, 18 cognitive + physical treatment. | DKEFS Tower Test<br>"Cognitive outcomes",<br>MMSE                    | No cutoff defined                                                                                    | ICU discharge<br>3 mos post              | RCT              |
| Christie, 2006 (6)  | USA     | Cross-sectional          | ARDS survivors contacted by phone | ARDS survivors from Internet support website                                                                                           | 79                                                                                                                                                                             | Telephone based cognitive tool being developed/ validated by authors | 2 item scores $\geq$ 1 SD below population norm or a single test score 1.5 SD below population norm. | Average 5 years post discharge           | Poor             |
| Chung, 2017 (7)     | Korea   | Cross-sectional          | MICU + CCU + SICU                 | Patients referred for psychiatric assessment at discharge from ICU.                                                                    | 30                                                                                                                                                                             | Mini-Cog                                                             | Recall of < 9 items or abnormal clock.                                                               | ICU discharge                            | Poor             |

|                             |             |                      |             |                                                                                             |                                                                              |                                                                                                                                                                                                                     |                                                                                                                                                                 |                                        |      |
|-----------------------------|-------------|----------------------|-------------|---------------------------------------------------------------------------------------------|------------------------------------------------------------------------------|---------------------------------------------------------------------------------------------------------------------------------------------------------------------------------------------------------------------|-----------------------------------------------------------------------------------------------------------------------------------------------------------------|----------------------------------------|------|
| <b>Daly, 2009 (8)</b>       | USA         | Prospective cohort   | Four ICUs   | Chronic critical illness (ventilated > 72h) recruited into separate RCT.                    | 257                                                                          | Katzman Short Orientation-Memory Concentration Test (0-28)                                                                                                                                                          | Katzman score > 6.                                                                                                                                              | ICU discharge                          | Good |
| <b>de Azevedo, 2017 (9)</b> | Brazil      | Prospective cohort   | MICU + SICU | Unselected ICU patients without previous cognitive impairment                               | 724 at discharge. 413 at follow-up.                                          | Forward/ backward digit span, Rey Auditory Verbal Learning Test (RAVLT), Clock-drawing test, verbal fluency, MMSE                                                                                                   | Mild or moderate CI = two test scores 1.5 SD below mean or one test 2 SD below mean.<br><br>Severe CI = 3+ tests 1.5 SD below mean or 2+ tests 2 SD below mean. | Min 3 mos (average 11 mos, range 3-18) | Good |
| <b>Dennis, 2011 (10)</b>    | Australia   | Prospective cohort   | MSICU       | >48 h length of stay                                                                        | 71                                                                           | FIM Cognition category                                                                                                                                                                                              | “worse than before”                                                                                                                                             | 6 mos post                             | Good |
| <b>de Rooji, 2008 (11)</b>  | Netherlands | Retrospective cohort | MSICU       | 80+ years of age who were alive at time of recruitment                                      | 204, with 35 excluded due to no relative to assess CI.<br><br>164 relatives. | IQCODE-SF                                                                                                                                                                                                           | IQCODE-SF > 3.1                                                                                                                                                 | 1-5.9 yrs (median 3.7)                 | Good |
| <b>Detsky, 2017 (12)</b>    | USA         | Prospective cohort   | MICU + SICU | Life-sustaining therapy (ventilated >48h or vasopressors >24 h), with >3 day ICU stay       | 166 full follow-up. 169 partial follow-up.                                   | Phone interview with patient. Or surrogate.                                                                                                                                                                         | Patient/surrogate report of change in ability to remember most things, think clearly and solve day-to-day problems.                                             | 6 mos post                             | Poor |
| <b>Duggan, 2017 (13)</b>    | USA         | Prospective cohort   | MICU + SICU | Respiratory failure, cardiogenic shock or septic shock. Sample from BRAIN-ICU study.        | 136                                                                          | IQCODE/ Clin Dementia Rating used to exclude pre-existing CI pts<br><br>BRIEF-A patient and family, Trails B                                                                                                        | BRIEF-A $\geq 65$ (range 0-100, pop mean 50, SD 10).<br><br>Trails B adjusted t-score $\leq 35$ (0-100, 50, SD 10).                                             | 3 mos post                             | Good |
| <b>Duning, 2010 (14)</b>    | Germany     | Case control         | SICU        | 18 to 80 year old patients with >72h length of stay who had 1 or more hypoglycemic episodes | 37 hypoglycemic episode patients + 37 matching controls.                     | MMSE, Boston Naming Test, Nuernberg Gero Inv, Digit Symbol Sub, Color word interference, Wechsler Memory Scale (WMS) Digit Span forward/ backward, Trails A, Trails B, Regensburg Word Fluency test, Rey Osterrieth | No defined cutoff                                                                                                                                               | 1+ years                               | Good |

|                           |          |                                            |                           |                                                           |                                                                      | Complex Figure (ROCF),<br>Auditory Verbal Learning<br>Test                                                                                                                                                            |                                                                                                                                                            |                                     |      |
|---------------------------|----------|--------------------------------------------|---------------------------|-----------------------------------------------------------|----------------------------------------------------------------------|-----------------------------------------------------------------------------------------------------------------------------------------------------------------------------------------------------------------------|------------------------------------------------------------------------------------------------------------------------------------------------------------|-------------------------------------|------|
| <b>Ely, 2004 (15)</b>     | USA      | Prospective cohort                         | MICU + coronary ICU       | Mechanically ventilated                                   | 128                                                                  | MMSE                                                                                                                                                                                                                  | MMSE < 24.                                                                                                                                                 | At ICU discharge                    | Good |
| <b>Girard, 2010 (16)</b>  | USA      | Prospective cohort (nested within ABC RCT) | MICU                      | Ventilated 12h to 2 weeks. Previously living independent. | 128 eligible.<br>77 at 3 mos.<br>52 at 12 mos.                       | Digit span, Trails A, Digit Symbol coding, RAVLT, ROCF, Verbal Fluency, MMSE                                                                                                                                          | Mild-mod CI = two tests > 1.5 SD below mean or one tests > 2 SD below mean.<br><br>Severe CI = 3+ tests > 1.5 SD below mean or 2+ tests > 2 SD below mean. | 3 mos post 12 mos post              | Good |
| <b>Granja, 2005 (17)</b>  | Portugal | Prospective cohort                         | 10 ICUs                   | Unselected ICU survivors                                  | 464                                                                  | Author developed questionnaire about recollect of experiences lived by ICU survivors<br><br>Two questions from questionnaire re: (1) difficulties in concentration, and (2) difficulties in remembering recent events | “yes”                                                                                                                                                      | 6 mos post                          | Poor |
| <b>Gunther, 2012 (18)</b> | USA      | Prospective cohort                         | MICU + SICU + cardiac ICU | Respiratory failure or shock. Could undergo MRI.          | 43                                                                   | RBANS, Trails A+B                                                                                                                                                                                                     | CI = Extremely low + borderline                                                                                                                            | 3 mos post 12 mos post              | Good |
| <b>Hopkins, 1999 (19)</b> | USA      | Prospective follow-up                      | ICU                       | ARDS                                                      | 55                                                                   | WAIS–Revised, WMS–Revised, RAVLT, ROCF (copy, immediate and 30-min delayed recall), Trails A and B, Verbal Fluency (letters F, A, S)                                                                                  | Impaired on at least one cognitive test.                                                                                                                   | At hospital discharge 1 year post   | Poor |
| <b>Hopkins, 2005 (20)</b> | USA      | Prospective follow-up                      | ICU                       | ARDS                                                      | 66 patients at 1-year follow-up.<br>62 patients at 2-year follow-up. | WAIS–Revised, WMS–Revised, RAVLT, ROCF (copy, immediate and 30-min delayed recall), Trails A and B, Verbal Fluency (letters F, A, S)                                                                                  | Two or more cognitive test scores >1.5 SD or 1 test score >2 SD below the normative population mean.                                                       | At hospital discharge 1 year 2 year | Poor |
| <b>Hughes, 2017 (21)</b>  | USA      | Prospective cohort                         | ICU                       | MIND-ICU and BRAIN-ICU study patients                     | 494 patients at 3-month follow-up<br>413 patients at 12-             | RBANS Trials B                                                                                                                                                                                                        | <78 on RBANS (>1.5 SD below adjusted population mean)                                                                                                      | 3 mos 12 mos                        | Good |

|                              |         |                          |                     |                                                                      | month follow-up                                                                |                                                                                                                                                  | Trials B >1 SD below adjusted population mean                                                                                                                                   |                                                          |      |
|------------------------------|---------|--------------------------|---------------------|----------------------------------------------------------------------|--------------------------------------------------------------------------------|--------------------------------------------------------------------------------------------------------------------------------------------------|---------------------------------------------------------------------------------------------------------------------------------------------------------------------------------|----------------------------------------------------------|------|
| <b>Jackson, 2003 (22)</b>    | USA     | Prospective follow-up    | MICU + coronary ICU | Mechanically ventilated                                              | 41                                                                             | MMSE, Digital Symbol Coding, Thurstone Word Fluency, Letter Number Sequencing, Verbal Paired Associates, Digit Symbol Paired Recall, Faces, ROCF | Either two neuropsychological test scores at least 2 SD below the norm-referenced mean or three scores at least 1.5 SD below the norm-referenced mean.                          | 6 mos<br>[MMSE at hospital discharge 6 mos post]         | Fair |
| <b>Jackson, 2010 (23)</b>    | USA     | RCT substudy (ABC trial) | ICU                 | Ventilated >12h                                                      | 89 intervention, 91 controls.                                                  | MMSE, Digit Span, Digit Symbol Coding, RAVLT, ROCF, Trails A and B, Verbal Fluency                                                               | If (1) scored 1.5 SDs or more below the mean on two or more of the nine cognitive tests, or (2) scored 2 or more SDs below the mean on one or more of the nine cognitive tests. | 3 mos post<br>12 mos post                                | RCT  |
| <b>Jackson, 2012 (24)</b>    | USA     | Pilot RCT                | MICU + SICU         | Subset of patients from RETURN RCT. Previously living independently. | 12 intervention, 8 controls.                                                   | Screened with TOWER test for cognition at discharge<br><br>3 mos: TOWER, MMSE, Dysexecutive Questionnaire                                        | No cutoff defined                                                                                                                                                               | At hospital discharge<br>3 mos post                      | RCT  |
| <b>Jones, 2006 (25)</b>      | UK      | Prospective cohort       | ICU                 | ICU stay > 6 days), ventilated > 48h                                 | 30 within ICU.<br>30 one week post-discharge.<br>16 two months post-discharge. | CANTAB “Stocking of Cambridge”, CANTAB pattern recognition recall                                                                                | ≤25th percentile compared with age- and sex-matched controls.                                                                                                                   | Within ICU,<br>1 week post ICU d/c<br>2 mos post ICU d/c | Fair |
| <b>Kapfhammer, 2004 (26)</b> | Germany | Prospective longitudinal | ICU                 | ARDS                                                                 | 46                                                                             | Syndrom Kurz test                                                                                                                                | Syndrom Kurz scores > 5 are “clinically significant”.                                                                                                                           | 3-13 years f/u                                           | Good |
| <b>Ketterer, 2016 (27)</b>   | USA     | Prospective longitudinal | ICU                 | Unselected ICU patients                                              | 107                                                                            | Mini-Cog                                                                                                                                         | Impairment on any of the tasks (results only for those who were alert & oriented).                                                                                              | Within ICU                                               | Good |
| <b>Larson, 2007 (28)</b>     | USA     | Prospective cohort       | ICU                 | Sample from RCT of high vs. low tidal volume in ARDS.                | 70                                                                             | WAIS-R                                                                                                                                           | 2 or more test scores > 1.5 SD or 1 test score > 2SD below norms for age, gender, education corrected t scores.                                                                 | At hospital discharge<br>1 yr post<br>2 yrs post         | Good |



|                                 |     |                                    |                                     |                                                        |                                             |                                                                                                                                                                                                                                   |                                                                                                                                                                                                                                                |                                                 |      |
|---------------------------------|-----|------------------------------------|-------------------------------------|--------------------------------------------------------|---------------------------------------------|-----------------------------------------------------------------------------------------------------------------------------------------------------------------------------------------------------------------------------------|------------------------------------------------------------------------------------------------------------------------------------------------------------------------------------------------------------------------------------------------|-------------------------------------------------|------|
| <b>Maley, 2016 (29)</b>         | USA | Cross-sectional                    | 2 MICUs                             | Length of stay > 2 days                                | 43                                          | Health Utilities Index-3 (HUI-3) cognitive questions                                                                                                                                                                              | Survivor reporting being “somewhat forgetful” or worst or having more than “a little difficulty” in ability to think and solve day-to-day problems.                                                                                            | 6-12 mos post hospital discharge (median 8 mos) | Poor |
| <b>Mikkelsen, 2009 (30)</b>     | USA | Cross-sectional                    | ARDS survivor website respondents   | ARDS                                                   | 79                                          | Telephone interview administered tests: NCSE: Orientation, WAIS III: Digit Span, WAIS III: Letter-Number Sequencing, WAIS-III: Logical Memory I, WAIS III: Similarities, NCSE: Judgement, Hayling Sentence Completion Test, COWAT | CI on each test = > 1 SD below norms.<br><br>CI = score of > 1 SD below norms on 2 or more tests or > 1.5 SD below norms on 1 test.                                                                                                            | Mean no. of mos since ARDS onset 27.6 (SD 35.2) | Poor |
| <b>Mikkelsen, 2012 (31)</b>     | USA | Prospective cohort                 | ICU (ACOS and FACTT study patients) | ARDS. Sample from FACTT and EA-PAC studies             | 102 at 12 mos (75 for risk factor analysis) | Telephone neuropsych battery                                                                                                                                                                                                      | Impairment on a domain = > 2SD below norms.<br><br>CI = impairment in memory, verbal fluency, or executive function in those who completed tests in each of these domains.                                                                     | 2 mos post<br>12 mos post                       | Good |
| <b>Needham, 2013 (32)</b>       | USA | Prospective longitudinal follow-up | ICUs                                | Acute lung injury. Sample from EDEN study              | 514 at 6 mos.<br>487 at 12 mos.             | MMSE telephone version                                                                                                                                                                                                            | Telephone MMSE score ≤24.                                                                                                                                                                                                                      | 6 mos post<br>12 mos post                       | Good |
| <b>Needham, 2016 (33)</b>       | USA | RCT                                | 35 ICUs                             | Sepsis-associated ARDS                                 | 130 at 6 mos.<br>149 at 12 mos.             | Hayling Sentence Completion Test, Controlled Oral Word Association (COWA), WMS-III Logical Memory I and Logical Memory II, WAIS-III Similarities, WAIS-III Digit Span                                                             | Having either one cognitive test within the battery with a score at least 2 SDs below population norms (i.e., bottom 2.5%) or at least two tests with a score equal to or greater than 1.5 SDs below norms (i.e., bottom 6.7% for both tests). | 6 mos post<br>12 mos post                       | RCT  |
| <b>Pandharipande, 2013 (34)</b> | USA | Prospective cohort                 | MICU + SICU                         | Respiratory failure, cardiogenic shock or septic shock | 821 in-hospital.<br>467 at follow-up.       | RBANS, Trails B                                                                                                                                                                                                                   | RBANS scores “similar to TBI”.                                                                                                                                                                                                                 | 3 mos post<br>12 mos post                       | Good |

|                                 |         |                                                                      |       |                                                                                            |     |                                                                                                                                                                                                                                                                                                                                                                                 |                                                                                                                                                              |                                                                                      |      |
|---------------------------------|---------|----------------------------------------------------------------------|-------|--------------------------------------------------------------------------------------------|-----|---------------------------------------------------------------------------------------------------------------------------------------------------------------------------------------------------------------------------------------------------------------------------------------------------------------------------------------------------------------------------------|--------------------------------------------------------------------------------------------------------------------------------------------------------------|--------------------------------------------------------------------------------------|------|
| <b>Pfoh, 2015 (35)</b>          | USA     | Cross-sectional secondary analysis of two prospective cohort studies | ICU   | ARDS<br><br>Sample from ARDSNet long-term outcome study (ALTOS) and ABC study              | 242 | ALTOS group:<br>Telephone MMSE + neuropsych battery (Neurobehavioral Cognitive Status Examination orientation score, WAIS-III Digit Span, WAIS-III Logical Memory I and II, Verbal Fluency Test)<br><br>ABC group:<br>In-person MMSE + neuropsych battery (Digit Span and Digit Symbol from WAIS-III, RAVLT, ROCF-Copy and Delayed Recall, Trails A and B, Verbal Fluency Test) | CI = MMSE < 24 or < 27 (only the former reported).<br><br>CI on neuropsych testing = 1+ test $\geq$ 2 SDs below norms or 2+ tests $\geq$ 1.5 SD below norms. | ALTOS group: 6 mos + 12 mos<br><br>ABC group: at hospital discharge + 3 mos + 12 mos | Good |
| <b>Rothenhausler, 2001 (36)</b> | Germany | Prospective cohort with longitudinal follow-up                       | ICU   | ARDS                                                                                       | 46  | SKT                                                                                                                                                                                                                                                                                                                                                                             | CI= score >8.<br>Sub-threshold cognitive disorder= score of 5 to 8.<br>No cognitive deficits= score of 0 to 4.                                               | Median 6 years post                                                                  | Poor |
| <b>Sacanella, 2011 (37)</b>     | Spain   | Prospective cohort                                                   | ICU   | > 65 years of age who survived a medical ICU admission > 12 months. Previously autonomous. | 112 | MMSE, IQCODE                                                                                                                                                                                                                                                                                                                                                                    | MMSE < 24.                                                                                                                                                   | Discharge, 12 mos                                                                    | Good |
| <b>Sakuramoto, 2015 (38)</b>    | Japan   | Prospective cohort                                                   | ICU   | Medical and surgical ICU patients                                                          | 79  | MMSE                                                                                                                                                                                                                                                                                                                                                                            | MMSE < 24                                                                                                                                                    | Discharge                                                                            | Good |
| <b>Semmler, 2013 (39)</b>       | Germany | Prospective cohort                                                   | ICU   | ICU patients                                                                               | 44  | NeuroCogFx Trials A Trials B                                                                                                                                                                                                                                                                                                                                                    | Impaired when compared the pre-morbid verbal ability                                                                                                         | 6-24 mos post-ICU discharge                                                          | Good |
| <b>Sukantarat, 2005 (40)</b>    | UK      | Prospective cohort                                                   | MSICU | Survived $\geq$ 72 hrs                                                                     | 51  | Hayling Sentence Completion Test, Modified Six Element Test, Raven's Standard Progressive Matrices                                                                                                                                                                                                                                                                              | Impaired on at least one test (below 5th percentile).                                                                                                        | 3 mos<br>9 mos                                                                       | Fair |

|                                  |             |                    |                          |                                                 |                                         |                                                                                                                                                                                                                                                                |                                                                                                                                                         |                                                                        |      |
|----------------------------------|-------------|--------------------|--------------------------|-------------------------------------------------|-----------------------------------------|----------------------------------------------------------------------------------------------------------------------------------------------------------------------------------------------------------------------------------------------------------------|---------------------------------------------------------------------------------------------------------------------------------------------------------|------------------------------------------------------------------------|------|
| <b>Timmers, 2011 (41)</b>        | Netherlands | Prospective cohort | SICU                     | Surgical ICU patients                           | 575                                     | EQ-6D Cognitive Functioning question                                                                                                                                                                                                                           | Number reporting problem in cognitive dimension.                                                                                                        | Minimum 6 years<br>Mean 8.4 (SD 1.4), range 6-11 years                 | Poor |
| <b>Torgersen, 2011 (42)</b>      | Norway      | Prospective cohort | Primarily SICU           | Length of stay $\geq 24$ h and MMSE $\geq 24$ . | 55 included. 28 completed full battery. | CANTAB                                                                                                                                                                                                                                                         | Z-score below -2.0 standard deviations (SDs) on two or below -1.5 SDs on three out of 10 results reported from standardized neuropsychological testing. | Within 14d of ICU discharge (in hospital)<br>3 mos post<br>12 mos post | Good |
| <b>van der Schaaf, 2008 (43)</b> | Netherlands | Prospective cohort | Mixed ICU                | Consecutively admitted patients with MV > 48h   | 69                                      | MMSE                                                                                                                                                                                                                                                           | MMSE <24.                                                                                                                                               | 3-7 days after hospital discharge                                      | Good |
| <b>Viana, 2017 (44)</b>          | Brazil      | Prospective cohort | 2 ICUs                   | COPD with respiratory failure                   | 20 completed final visit.               | MMSE                                                                                                                                                                                                                                                           | No defined cutoff                                                                                                                                       | First week post ICU discharge,<br>1 mo post<br>3 mos post              | Poor |
| <b>Woon, 2012 (45)</b>           | USA         | Prospective cohort | Shock, Trauma + Resp ICU | Ventilated > 48h, age 18-85.                    | 70 enrolled. 53 completed follow-up.    | MMSE, Mini-Cog, WRAT-3, WASI, Stroop Color-Word Test-Golden Version, Finger Tapping Test, COWAT, WMS-III Logical Memory subtest, California Verbal Learning Test-II, ROCF, WAIS-Revised Digit Symbol subtest, Trails A and B, Hayling Sentence Completion Test | Scores on two or more cognitive tests >1.5 SD or one test score that was >2 SD below the normative population mean.                                     | At hospital discharge<br>6 mos post                                    | Poor |
| <b>Zhao, 2017 (46)</b>           | China       | RCT                | PACU, Neuro ICU + MICU   | Unselected ICU patients                         | 167 intervention, 165 control           | MoCA, Author developed questionnaire                                                                                                                                                                                                                           | MOCA <26, questionnaire score 0 to 1.                                                                                                                   | 72 hrs post ICU discharge<br>3 mos post                                | RCT  |

**Supplemental Digital Content 3.** Risk of bias assessments for randomized controlled trials using the Cochrane Risk of Bias tool.

|                    | Random Sequence Generation | Allocation Concealment | Blinding [participants & personnel] | Blinding [outcome assessors] | Attrition Bias [Incomplete Outcome Data] | Selective Outcome Reporting |
|--------------------|----------------------------|------------------------|-------------------------------------|------------------------------|------------------------------------------|-----------------------------|
| Brummel, 2017 (5)  | Low                        | Low                    | High                                | Low                          | High                                     | Low                         |
| Jackson, 2010 (23) | Low                        | Low                    | Low                                 | Low                          | High                                     | Low                         |
| Jackson, 2012 (24) | Low                        | Low                    | Low                                 | Low                          | Low                                      | Low                         |
| Needham, 2016 (33) | Low                        | Low                    | Low                                 | Low                          | Low                                      | High                        |
| Zhao, 2017 (46)    | Low                        | Low                    | Unknown                             | Unknown                      | Low                                      | Low                         |

## References

1. Adhikari NKJ, McAndrews MP, Tansey CM, Matté A, Pinto R, Cheung AM, Diaz-Granados N, Barr A, Herridge MS. Self-reported symptoms of depression and memory dysfunction in survivors of ARDS. *Chest* 2009;135:678–687.
2. Adhikari NKJ, Tansey CM, McAndrews MP, Matté A, Pinto R, Cheung AM, Diaz-Granados N, Herridge MS. Self-reported depressive symptoms and memory complaints in survivors five years after ARDS. *Chest* 2011;140:1484–1493.
3. Ambrosino N, Bruletti G, Scala V, Porta R, Vitacca M. Cognitive and perceived health status in patient with chronic obstructive pulmonary disease surviving acute on chronic respiratory failure: a controlled study. *Intensive Care Med* 2002;28:170–177.
4. Baumbach P, Meissner W, Guenther A, Witte OW, Götz T. Perceived cognitive impairments after critical illness: a longitudinal study in survivors and family member controls. *Acta Anaesthesiol Scand* 2016;60:1121–1130.
5. Brummel NE, Girard TD, Ely EW, Pandharipande PP, Morandi A, Hughes CG, Graves AJ, Shintani A, Murphy E, Work B, Pun BT, Boehm L, Gill TM, Dittus RS, Jackson JC. Feasibility and safety of early combined cognitive and physical therapy for critically ill medical and surgical patients: the Activity and Cognitive Therapy in ICU (ACT-ICU) trial. *Intensive Care Med* 2014;40:370–379.
6. Christie JD, Biester RCP, Taichman DB, Shull WH, Hansen-Flaschen J, Shea JA, Hopkins RO. Formation and validation of a telephone battery to assess cognitive function in acute respiratory distress syndrome survivors. *J Crit Care* 2006;21:125–132.
7. Chung CR, Yoo HJ, Park J, Ryu S. Cognitive Impairment and Psychological Distress at Discharge from Intensive Care Unit. *Psychiatry Investig* 2017;14:376–379.

8. Daly BJ, Douglas SL, Gordon NH, Kelley CG, O'Toole E, Montenegro H, Higgins P. Composite outcomes of chronically critically ill patients 4 months after hospital discharge. *Am J Crit Care* 2009;18:456–464; quiz 465.
9. de Azevedo JRA, Montenegro WS, Rodrigues DP, de C Souza SC, Araujo VFS, de Paula MP, Prazeres PHCP, da Luz Leitão A, Mendonça AVN. Long-term cognitive outcomes among unselected ventilated and non-ventilated ICU patients. *J Intensive Care* 2017;5:18.
10. Dennis DM, Hebden-Todd TK, Marsh LJ, Cipriano LJ, Parsons RW. How do Australian ICU survivors fare functionally 6 months after admission? *Crit Care Resusc* 2011;13:9–16.
11. de Rooij SEJA, Govers AC, Korevaar JC, Giesbers AW, Levi M, de Jonge E. Cognitive, functional, and quality-of-life outcomes of patients aged 80 and older who survived at least 1 year after planned or unplanned surgery or medical intensive care treatment. *J Am Geriatr Soc* 2008;56:816–822.
12. Detsky ME, Harhay MO, Bayard DF, Delman AM, Buehler AE, Kent SA, Ciuffetelli IV, Cooney E, Gabler NB, Ratcliffe SJ, Mikkelsen ME, Halpern SD. Discriminative Accuracy of Physician and Nurse Predictions for Survival and Functional Outcomes 6 Months After an ICU Admission. *JAMA* 2017;317:2187–2195.
13. Duggan MC, Wang L, Wilson JE, Dittus RS, Ely EW, Jackson JC. The relationship between executive dysfunction, depression, and mental health-related quality of life in survivors of critical illness: Results from the BRAIN-ICU investigation. *J Crit Care* 2017;37:72–79.
14. Duning T, van den Heuvel I, Dickmann A, Volkert T, Wempe C, Reinholz J, Lohmann H, Freise H, Ellger B. Hypoglycemia aggravates critical illness-induced neurocognitive dysfunction. *Diabetes Care* 2010;33:639–644.

15. Ely EW, Shintani A, Truman B, Speroff T, Gordon SM, Harrell FE, Inouye SK, Bernard GR, Dittus RS. Delirium as a predictor of mortality in mechanically ventilated patients in the intensive care unit. *JAMA* 2004;291:1753–1762.
16. Girard TD, Jackson JC, Pandharipande PP, Pun BT, Thompson JL, Shintani AK, Gordon SM, Canonico AE, Dittus RS, Bernard GR, Ely EW. Delirium as a predictor of long-term cognitive impairment in survivors of critical illness. *Crit Care Med* 2010;38:1513–1520.
17. Granja C, Lopes A, Moreira S, Dias C, Costa-Pereira A, Carneiro A. Patients' recollections of experiences in the intensive care unit may affect their quality of life. *Crit Care* 2005;9:R96–R109.
18. Gunther ML, Morandi A, Krauskopf E, Pandharipande P, Girard TD, Jackson JC, Thompson J, Shintani AK, Geevarghese S, Miller RR, Canonico A, Merkle K, Cannistraci CJ, Rogers BP, Gatenby JC, Heckers S, Gore JC, Hopkins RO, Ely EW, VISIONS Investigation, VISualizing Icu SurvivOrs Neuroradiological Sequelae. The association between brain volumes, delirium duration, and cognitive outcomes in intensive care unit survivors: the VISIONS cohort magnetic resonance imaging study\*. *Crit Care Med* 2012;40:2022–2032.
19. Hopkins RO, Weaver LK, Pope D, Orme JF, Bigler ED, Larson-LOHR V. Neuropsychological sequelae and impaired health status in survivors of severe acute respiratory distress syndrome. *Am J Respir Crit Care Med* 1999;160:50–56.
20. Hopkins RO, Weaver LK, Collingridge D, Parkinson RB, Chan KJ, Orme JF. Two-year cognitive, emotional, and quality-of-life outcomes in acute respiratory distress syndrome. *Am J Respir Crit Care Med* 2005;171:340–347.
21. Hughes CG, Patel MB, Jackson JC, Girard TD, Geevarghese SK, Norman BC, Thompson JL, Chandrasekhar R, Brummel NE, May AK, Elstad MR, Wasserstein ML, Goodman RB,

- Moons KG, Dittus RS, Ely EW, Pandharipande PP, MIND-ICU, BRAIN-ICU investigators. Surgery and Anesthesia Exposure Is Not a Risk Factor for Cognitive Impairment After Major Noncardiac Surgery and Critical Illness. *Ann Surg* 2017;265:1126–1133.
22. Jackson JC, Hart RP, Gordon SM, Shintani A, Truman B, May L, Ely EW. Six-month neuropsychological outcome of medical intensive care unit patients. *Crit Care Med* 2003;31:1226–1234.
23. Jackson JC, Girard TD, Gordon SM, Thompson JL, Shintani AK, Thomason JWW, Pun BT, Canonico AE, Dunn JG, Bernard GR, Dittus RS, Ely EW. Long-term cognitive and psychological outcomes in the awakening and breathing controlled trial. *Am J Respir Crit Care Med* 2010;182:183–191.
24. Jackson JC, Ely EW, Morey MC, Anderson VM, Denne LB, Clune J, Siebert CS, Archer KR, Torres R, Janz D, Schiro E, Jones J, Shintani AK, Levine B, Pun BT, Thompson J, Brummel NE, Hoenig H. Cognitive and physical rehabilitation of intensive care unit survivors: results of the RETURN randomized controlled pilot investigation. *Crit Care Med* 2012;40:1088–1097.
25. Jones C, Griffiths RD, Slater T, Benjamin KS, Wilson S. Significant cognitive dysfunction in non-delirious patients identified during and persisting following critical illness. *Intensive Care Med* 2006;32:923–926.
26. Kapfhammer HP, Rothenhäusler HB, Krauseneck T, Stoll C, Schelling G. Posttraumatic stress disorder and health-related quality of life in long-term survivors of acute respiratory distress syndrome. *Am J Psychiatry* 2004;161:45–52.



27. Ketterer MW, Alaali Y, Yessayan L, Jennings J. “Alert and Oriented  $\times 3$ ” correlates of Mini-Cog performance in a post/nondelirious intensive care unit sample. *Psychosomatics* 2016;57:194–199.
28. Larson MJ, Weaver LK, Hopkins RO. Cognitive sequelae in acute respiratory distress syndrome patients with and without recall of the intensive care unit. *J Int Neuropsychol Soc* 2007;13:595–605.
29. Maley JH, Brewster I, Mayoral I, Siruckova R, Adams S, McGraw KA, Piech AA, Detsky M, Mikkelsen ME. Resilience in Survivors of Critical Illness in the Context of the Survivors’ Experience and Recovery. *Ann Am Thorac Soc* 2016;13:1351–1360.
30. Mikkelsen ME, Shull WH, Biester RC, Taichman DB, Lynch S, Demissie E, Hansen-Flaschen J, Christie JD. Cognitive, mood and quality of life impairments in a select population of ARDS survivors. *Respirology* 2009;14:76–82.
31. Mikkelsen ME, Christie JD, Lanken PN, Biester RC, Thompson BT, Bellamy SL, Localio AR, Demissie E, Hopkins RO, Angus DC. The adult respiratory distress syndrome cognitive outcomes study: long-term neuropsychological function in survivors of acute lung injury. *Am J Respir Crit Care Med* 2012;185:1307–1315.
32. Needham DM, Dinglas VD, Bienvenu OJ, Colantuoni E, Wozniak AW, Rice TW, Hopkins RO, NIH NHLBI ARDS Network. One year outcomes in patients with acute lung injury randomised to initial trophic or full enteral feeding: prospective follow-up of EDEN randomised trial. *BMJ* 2013;346:f1532.
33. Needham DM, Colantuoni E, Dinglas VD, Hough CL, Wozniak AW, Jackson JC, Morris PE, Mendez-Tellez PA, Ely EW, Hopkins RO. Rosuvastatin versus placebo for delirium in intensive care and subsequent cognitive impairment in patients with sepsis-associated acute

respiratory distress syndrome: an ancillary study to a randomised controlled trial. *Lancet Respir Med* 2016;4:203–212.

34. Pandharipande PP, Girard TD, Jackson JC, Morandi A, Thompson JL, Pun BT, Brummel NE, Hughes CG, Vasilevskis EE, Shintani AK, Moons KG, Geevarghese SK, Canonico A, Hopkins RO, Bernard GR, Dittus RS, Ely EW. Long-Term Cognitive Impairment after Critical Illness. *New England Journal of Medicine* 2013;369:1306–1316.
35. Pfoh ER, Chan KS, Dinglas VD, Girard TD, Jackson JC, Morris PE, Hough CL, Mendez-Tellez PA, Ely EW, Huang M, Needham DM, Hopkins RO, NIH NHLBI ARDS Network. Cognitive screening among acute respiratory failure survivors: a cross-sectional evaluation of the Mini-Mental State Examination. *Crit Care* 2015;19:220.
36. Rothenhäusler HB, Ehrentraut S, Stoll C, Schelling G, Kapfhammer HP. The relationship between cognitive performance and employment and health status in long-term survivors of the acute respiratory distress syndrome: results of an exploratory study. *Gen Hosp Psychiatry* 2001;23:90–96.
37. Sacanella E, Pérez-Castejón JM, Nicolás JM, Masanés F, Navarro M, Castro P, López-Soto A. Functional status and quality of life 12 months after discharge from a medical ICU in healthy elderly patients: a prospective observational study. *Crit Care* 2011;15:R105.
38. Sakuramoto H, Subrina J, Unoki T, Mizutani T, Komatsu H. Severity of delirium in the ICU is associated with short term cognitive impairment. A prospective cohort study. *Intensive Crit Care Nurs* 2015;31:250–257.
39. Semmler A, Widmann CN, Okulla T, Urbach H, Kaiser M, Widman G, Mormann F, Weide J, Fliessbach K, Hoefl A, Jessen F, Putensen C, Heneka MT. Persistent cognitive

- impairment, hippocampal atrophy and EEG changes in sepsis survivors. *J Neurol Neurosurg Psychiatry* 2013;84:62–69.
40. Sukantarat KT, Burgess PW, Williamson RCN, Brett SJ. Prolonged cognitive dysfunction in survivors of critical illness. *Anaesthesia* 2005;60:847–853.
  41. Timmers TK, Verhofstad MHJ, Moons KGM, van Beeck EF, Leenen LPH. Long-term quality of life after surgical intensive care admission. *Arch Surg* 2011;146:412–418.
  42. Torgersen J, Hole JF, Kvåle R, Wentzel-Larsen T, Flaatten H. Cognitive impairments after critical illness. *Acta Anaesthesiol Scand* 2011;55:1044–1051.
  43. van der Schaaf M, Dettling DS, Beelen A, Lucas C, Dongelmans DA, Nollet F. Poor functional status immediately after discharge from an intensive care unit. *Disabil Rehabil* 2008;30:1812–1818.
  44. Viana RCTP, Pincelli MP, Pizzichini E, Silva AP, Manes J, Marconi TD, Steidle LJM. Chronic obstructive pulmonary disease exacerbation in the intensive care unit: clinical, functional and quality of life at discharge and 3 months of follow up. *Rev Bras Ter Intensiva* 2017;29:47–54.
  45. Woon FL, Dunn CB, Hopkins RO. Predicting cognitive sequelae in survivors of critical illness with cognitive screening tests. *Am J Respir Crit Care Med* 2012;186:333–340.
  46. Zhao J, Yao L, Wang C, Sun Y, Sun Z. The effects of cognitive intervention on cognitive impairments after intensive care unit admission. *Neuropsychol Rehabil* 2017;27:301–317.
